# Supplementary material for: Clinical validation of optimised RT-LAMP for the diagnosis of SARS-CoV-2 infection
Source: PubMed Central journal article supplement (PMC8355225; doi:10.1038/s41598-021-95607-1), 2021-08-10
Supplement: 41598_2021_95607_MOESM1_ESM.pdf [file 41598_2021_95607_MOESM1_ESM.pdf]

**Supplementary information**  
**Clinical Validation of Optimised RT-LAMP for the Diagnosis of SARS-CoV-2**  
**infection**

Boon Lim<sup>\*1,2</sup>, Jeremy Ratcliff<sup>\*3</sup>, Dorota A. Nawrot<sup>\*4</sup>, Yejong Yu<sup>1,2</sup>, Harshmeena R. Sanghani<sup>4</sup>, Chia-Chen Hsu<sup>1,2</sup>, Leon Peto<sup>5</sup>, Simon Evans<sup>5</sup>, Susanne H Hodgson<sup>5,6</sup>, Aikaterini Skeva<sup>7</sup>, Maria Adam<sup>7</sup>, Maria Panopoulou<sup>7</sup>, Christos E Zois<sup>7</sup>, Katy Poncin<sup>8</sup>, Sridhar R Vasudevan<sup>4</sup>, Siqi Dai<sup>1,2</sup>, Shuai Ren<sup>1,2</sup>, Hong Chang<sup>9</sup>, Zhanfeng Cui<sup>1,2,9</sup>, Peter Simmonds<sup>3</sup>, Wei E. Huang<sup>\*\*1,9</sup> and Monique I. Andersson<sup>\*\*5,10</sup>

<sup>1</sup>*Department of Engineering Science, University of Oxford, Parks Road, OX1 3PJ, Oxford, UK.*

<sup>2</sup>*Institute of Biomedical Engineering, Department of Engineering Science, University of Oxford, Oxford, OX3 7DQ, UK.*

<sup>3</sup>*Peter Medawar Building for Pathogen Research, Nuffield Department of Medicine, University of Oxford, OX1 3SY, Oxford, UK.*

<sup>4</sup>*Department of Pharmacology, University of Oxford, Mansfield Road, Oxford, UK.*

<sup>5</sup>*Department of Microbiology, Oxford University NHS Foundation Trust, Oxford, UK.*

<sup>6</sup>*Jenner Institute, Nuffield Department of Medicine, University of Oxford, Oxford, UK.*

<sup>7</sup>*Democritus University of Thrace, University Hospital of Alexandroupolis, Greece.*

<sup>8</sup>*Sir William Dunn School of Pathology, University of Oxford, Oxford, UK*

<sup>9</sup>*Oxford Suzhou Centre for Advanced Research (OSCAR), China, University of Oxford.*

<sup>10</sup>*Nuffield Division of Clinical Laboratory Science, Radcliffe Department of Medicine, University of Oxford, Oxford, UK*

\* These authors contributed equally to this work

\*\* For correspondence, E-mail [wei.huang@eng.ox.ac.uk](mailto:wei.huang@eng.ox.ac.uk) and [Monique.Andersson@ouh.nhs.uk](mailto:Monique.Andersson@ouh.nhs.uk)

## Supplementary information

**Supplementary Table S1.** Performance of the improved RT-LAMP assay in detecting SARS-CoV-2 from RNA extract isolated from patient samples.

| RT-LAMP, May-June.2020 UK |                |          |                |            |                |          |                              |
|---------------------------|----------------|----------|----------------|------------|----------------|----------|------------------------------|
| Sample                    | RT-qPCR Result | Ct Value | RT-LAMP Result | Sample     | RT-qPCR Result | Ct Value | RT-LAMP Result               |
| <b>B1</b>                 | NOT DETECTED   | -        | NEGATIVE       | <b>E1</b>  | NOT DETECTED   | -        | NEGATIVE                     |
| <b>B2</b>                 | NOT DETECTED   | -        | NEGATIVE       | <b>E2</b>  | NOT DETECTED   | -        | NEGATIVE                     |
| <b>B3</b>                 | NOT DETECTED   | -        | NEGATIVE       | <b>E3</b>  | NOT DETECTED   | -        | NEGATIVE                     |
| <b>B4</b>                 | NOT DETECTED   | -        | NEGATIVE       | <b>E4</b>  | NOT DETECTED   | -        | NEGATIVE                     |
| <b>B5</b>                 | NOT DETECTED   | -        | NEGATIVE       | <b>E5</b>  | NOT DETECTED   | -        | NEGATIVE                     |
| <b>B6</b>                 | NOT DETECTED   | -        | NEGATIVE       | <b>E6</b>  | NOT DETECTED   | -        | POSITIVE<br>(False positive) |
| <b>B7</b>                 | DETECTED       | 24.54    | POSITIVE       | <b>E7</b>  | NOT DETECTED   | -        | NEGATIVE                     |
| <b>B8</b>                 | NOT DETECTED   | -        | NEGATIVE       | <b>E8</b>  | NOT DETECTED   | -        | NEGATIVE                     |
| <b>B9</b>                 | DETECTED       | 21.45    | POSITIVE       | <b>E9</b>  | DETECTED       | 28.2     | POSITIVE                     |
| <b>B10</b>                | DETECTED       | 29.29    | POSITIVE       | <b>E10</b> | DETECTED       | 34.07    | NEGATIVE<br>(False negative) |
| <b>B11</b>                | DETECTED       | 25.02    | POSITIVE       | <b>E11</b> | NOT DETECTED   | -        | NEGATIVE                     |

|            |              |       |          |            |              |       |                                 |
|------------|--------------|-------|----------|------------|--------------|-------|---------------------------------|
| <b>B12</b> | NOT DETECTED | -     | NEGATIVE | <b>E12</b> | NOT DETECTED | -     | NEGATIVE                        |
| <b>C1</b>  | NOT DETECTED | -     | NEGATIVE | <b>F1</b>  | NOT DETECTED | -     | NEGATIVE                        |
| <b>C2</b>  | NOT DETECTED | -     | NEGATIVE | <b>F2</b>  | NOT DETECTED | -     | NEGATIVE                        |
| <b>C3</b>  | NOT DETECTED | -     | NEGATIVE | <b>F3</b>  | NOT DETECTED | -     | NEGATIVE                        |
| <b>C4</b>  | NOT DETECTED | -     | NEGATIVE | <b>F4</b>  | NOT DETECTED | -     | NEGATIVE                        |
| <b>C5</b>  | NOT DETECTED | -     | NEGATIVE | <b>F5</b>  | NOT DETECTED | -     | NEGATIVE                        |
| <b>C6</b>  | NOT DETECTED | -     | NEGATIVE | <b>F6</b>  | NOT DETECTED | -     | NEGATIVE                        |
| <b>C7</b>  | NOT DETECTED | -     | NEGATIVE | <b>F7</b>  | NOT DETECTED | -     | NEGATIVE                        |
| <b>C8</b>  | NOT DETECTED | -     | NEGATIVE | <b>F8</b>  | DETECTED     | 22.11 | POSITIVE                        |
| <b>C9</b>  | DETECTED     | 23.69 | POSITIVE | <b>F9</b>  | DETECTED     | 35.24 | NEGATIVE<br>(False<br>negative) |
| <b>C10</b> | DETECTED     | 17.53 | POSITIVE | <b>F10</b> | DETECTED     | 17.96 | POSITIVE                        |
| <b>C11</b> | DETECTED     | 30.54 | POSITIVE | <b>F11</b> | NOT DETECTED | -     | NEGATIVE                        |
| <b>C12</b> | NOT DETECTED | -     | NEGATIVE | <b>F12</b> | NOT DETECTED | -     | NEGATIVE                        |
| <b>D1</b>  | NOT DETECTED | -     | NEGATIVE | <b>G1</b>  | NOT DETECTED | -     | POSITIVE<br>(False<br>positive) |
| <b>D2</b>  | NOT DETECTED | -     | NEGATIVE | <b>G2</b>  | NOT DETECTED | -     | NEGATIVE                        |
| <b>D3</b>  | NOT DETECTED | -     | NEGATIVE | <b>G3</b>  | NOT DETECTED | -     | NEGATIVE                        |

|            |              |       |                                 |            |              |       |          |
|------------|--------------|-------|---------------------------------|------------|--------------|-------|----------|
| <b>D4</b>  | NOT DETECTED | -     | POSITIVE<br>(False<br>positive) | <b>G4</b>  | NOT DETECTED | -     | NEGATIVE |
| <b>D5</b>  | NOT DETECTED | -     | POSITIVE<br>(False<br>positive) | <b>G5</b>  | NOT DETECTED | -     | NEGATIVE |
| <b>D6</b>  | NOT DETECTED | -     | NEGATIVE                        | <b>G6</b>  | NOT DETECTED | -     | NEGATIVE |
| <b>D7</b>  | NOT DETECTED | -     | NEGATIVE                        | <b>G7</b>  | NOT DETECTED | -     | NEGATIVE |
| <b>D8</b>  | NOT DETECTED | -     | POSITIVE<br>(False<br>positive) | <b>G8</b>  | NOT DETECTED | -     | NEGATIVE |
| <b>D9</b>  | DETECTED     | 18.86 | POSITIVE                        | <b>G9</b>  | DETECTED     | 24.24 | POSITIVE |
| <b>D10</b> | DETECTED     | 22.61 | POSITIVE                        | <b>G10</b> | DETECTED     | 22.11 | POSITIVE |
| <b>D11</b> | NOT DETECTED | -     | NEGATIVE                        | <b>G11</b> | NOT DETECTED | -     | NEGATIVE |
| <b>D12</b> | NOT DETECTED | -     | NEGATIVE                        | <b>G12</b> | NOT DETECTED | -     | NEGATIVE |

| RT-LAMP, May-June 2021, Greece |                |          |                              |        |                |          |                |
|--------------------------------|----------------|----------|------------------------------|--------|----------------|----------|----------------|
| Sample                         | RT-qPCR Result | Ct Value | RT-LAMP Result               | Sample | RT-qPCR Result | Ct Value | RT-LAMP Result |
| 57942                          | DETECTED       | 15.1     | Positive                     | 58999  | NOT DETECTED   | -        | NEGATIVE       |
| 57813                          | DETECTED       | 17.5     | Positive                     | 58998  | NOT DETECTED   | -        | NEGATIVE       |
| 58030                          | DETECTED       | 17.9     | Positive                     | 58982  | NOT DETECTED   | -        | NEGATIVE       |
| 58348                          | DETECTED       | 22.1     | Positive                     | 58979  | NOT DETECTED   | -        | NEGATIVE       |
| 57981                          | DETECTED       | 22.5     | Positive                     | 58978  | NOT DETECTED   | -        | NEGATIVE       |
| 58405                          | DETECTED       | 26.8     | Positive                     | 58977  | NOT DETECTED   | -        | NEGATIVE       |
| 58071                          | DETECTED       | 27       | Positive                     | 58976  | NOT DETECTED   | -        | NEGATIVE       |
| 58063                          | DETECTED       | 28.1     | Positive                     | 58975  | NOT DETECTED   | -        | NEGATIVE       |
| 58620                          | DETECTED       | 19.5     | Positive                     | 60009  | NOT DETECTED   | -        | NEGATIVE       |
| 58349                          | DETECTED       | 22.1     | Positive                     | 60010  | NOT DETECTED   | -        | NEGATIVE       |
| 58285                          | DETECTED       | 25.17    | Positive                     | 53323  | DETECTED       | 16.2     | Positive       |
| 58036                          | DETECTED       | 31.3     | Positive                     | 53443  | DETECTED       | 17.7     | Positive       |
| 58017                          | DETECTED       | 34.2     | NEGATIVE<br>(False negative) | 54216  | DETECTED       | 31.8     | Positive       |

|       |          |      |                                 |       |          |       |                                 |
|-------|----------|------|---------------------------------|-------|----------|-------|---------------------------------|
| 58356 | DETECTED | 34.4 | NEGATIVE<br>(False<br>negative) | 59295 | DETECTED | 33.7  | NEGATIVE<br>(False<br>negative) |
| 57991 | DETECTED | 35   | NEGATIVE<br>(False<br>negative) | 53004 | DETECTED | 15.4  | Positive                        |
| 58038 | DETECTED | 35.4 | NEGATIVE<br>(False<br>negative) | 53002 | DETECTED | 16    | Positive                        |
| 58800 | DETECTED | 13   | Positive                        | 52977 | DETECTED | 19    | Positive                        |
| 58801 | DETECTED | 15.7 | Positive                        | 53003 | DETECTED | 19.8  | Positive                        |
| 58799 | DETECTED | 17.9 | Positive                        | 53834 | DETECTED | 21    | Positive                        |
| 58802 | DETECTED | 20.9 | Positive                        | 53056 | DETECTED | 25.18 | Positive                        |
| 58811 | DETECTED | 34.2 | NEGATIVE<br>(False<br>negative) | 53148 | DETECTED | 26    | Positive                        |
| 58789 | DETECTED | 18.6 | Positive                        | 53140 | DETECTED | 34    | Positive                        |
| 57981 | DETECTED | 22.5 | Positive                        | 52831 | DETECTED | 18    | Positive                        |
| 58951 | DETECTED | 23.1 | Positive                        | 52835 | DETECTED | 18    | Positive                        |
| 53505 | DETECTED | 25.4 | Positive                        | 52829 | DETECTED | 18.8  | Positive                        |
| 58405 | DETECTED | 26.2 | Positive                        | 52833 | DETECTED | 19    | Positive                        |
| 58320 | DETECTED | 28.7 | NEGATIVE<br>(False<br>negative) | 52832 | DETECTED | 20    | Positive                        |

|       |          |      |          |       |          |      |                              |
|-------|----------|------|----------|-------|----------|------|------------------------------|
| 53579 | DETECTED | 34.6 | Positive | 52876 | DETECTED | 20.3 | Positive                     |
| 53516 | DETECTED | 35   | Positive | 52830 | DETECTED | 21   | Positive                     |
| 54471 | DETECTED | 18.1 | Positive | 53124 | DETECTED | 22.4 | Positive                     |
| 54256 | DETECTED | 19.1 | Positive | 52566 | DETECTED | 13   | Positive                     |
| 54512 | DETECTED | 19.2 | Positive | 52824 | DETECTED | 17.7 | Positive                     |
| 54172 | DETECTED | 22.2 | Positive | 52567 | DETECTED | 18.2 | Positive                     |
| 54472 | DETECTED | 28.2 | Positive | 52825 | DETECTED | 20.5 | NEGATIVE<br>(False negative) |
| 54254 | DETECTED | 29.4 | Positive | 52826 | DETECTED | 27.5 | Positive                     |
| 54473 | DETECTED | 31.3 | Positive | 52828 | DETECTED | 29.4 | Positive                     |
| 54217 | DETECTED | 17.5 | Positive | 52823 | DETECTED | 30   | Positive                     |
| 49321 | DETECTED | 18.2 | Positive | 52803 | DETECTED | 33   | Positive                     |
| 58755 | DETECTED | 24.2 | Positive | 52549 | DETECTED | 16   | Positive                     |
| 58680 | DETECTED | 25.3 | Positive | 52542 | DETECTED | 18.5 | Positive                     |
| 54195 | DETECTED | 28   | Positive | 52407 | DETECTED | 23   | Positive                     |

|       |          |       |                                 |       |          |       |          |
|-------|----------|-------|---------------------------------|-------|----------|-------|----------|
| 54475 | DETECTED | 28.7  | Positive                        | 52408 | DETECTED | 23    | Positive |
| 54025 | DETECTED | 29    | Positive                        | 52410 | DETECTED | 24    | Positive |
| 53201 | DETECTED | 32.67 | Positive                        | 52406 | DETECTED | 27    | Positive |
| 53622 | DETECTED | 16.3  | NEGATIVE<br>(False<br>negative) | 52548 | DETECTED | 28.2  | Positive |
| 53359 | DETECTED | 17.9  | Positive                        | 52409 | DETECTED | 35    | Positive |
| 53988 | DETECTED | 19.7  | Positive                        | 52179 | DETECTED | 20.59 | Positive |
| 54016 | DETECTED | 19.9  | Positive                        | 52007 | DETECTED | 23    | Positive |
| 53978 | DETECTED | 20.9  | Positive                        | 59322 | DETECTED | 31.8  | Positive |
| 53629 | DETECTED | 26.1  | Positive                        | 59920 | DETECTED | 32.8  | Positive |
| 53625 | DETECTED | 30.8  | Positive                        | 59642 | DETECTED | 34    | Positive |
| 53826 | DETECTED | 31.9  | Positive                        | 52037 | DETECTED | 34.3  | Positive |
| 53744 | DETECTED | 17.6  | Positive                        | 52019 | DETECTED | 35.4  | Positive |
| 53569 | DETECTED | 21.7  | Positive                        | 52031 | DETECTED | 35.4  | Positive |
| 53823 | DETECTED | 23.5  | Positive                        | 52029 | DETECTED | 15.4  | Positive |



|       |          |      |                                 |       |          |      |          |
|-------|----------|------|---------------------------------|-------|----------|------|----------|
| 53787 | DETECTED | 30.2 | Positive                        | 52182 | DETECTED | 21   | Positive |
| 53762 | DETECTED | 30.4 | Positive                        | 52178 | DETECTED | 22.9 | Positive |
| 53512 | DETECTED | 33   | Positive                        | 59823 | DETECTED | 27.3 | Positive |
| 53977 | DETECTED | 34.8 | Positive                        | 52180 | DETECTED | 31   | Positive |
| 53767 | DETECTED | 35   | NEGATIVE<br>(False<br>negative) | 59324 | DETECTED | 31.8 | Positive |
| 52381 | DETECTED | 23.4 | Positive                        | 52354 | DETECTED | 32   | Positive |
| 60197 | DETECTED | 32.1 | NEGATIVE<br>(False<br>negative) | 59528 | DETECTED | 33   | Positive |
| 51951 | DETECTED | 37.1 | Positive                        | 52009 | DETECTED | 38.4 | Positive |

(a)

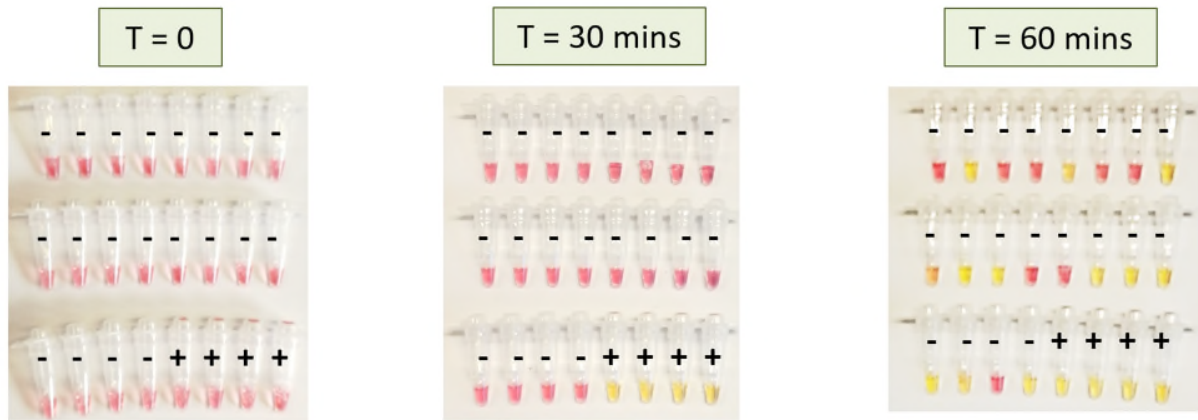

(b)

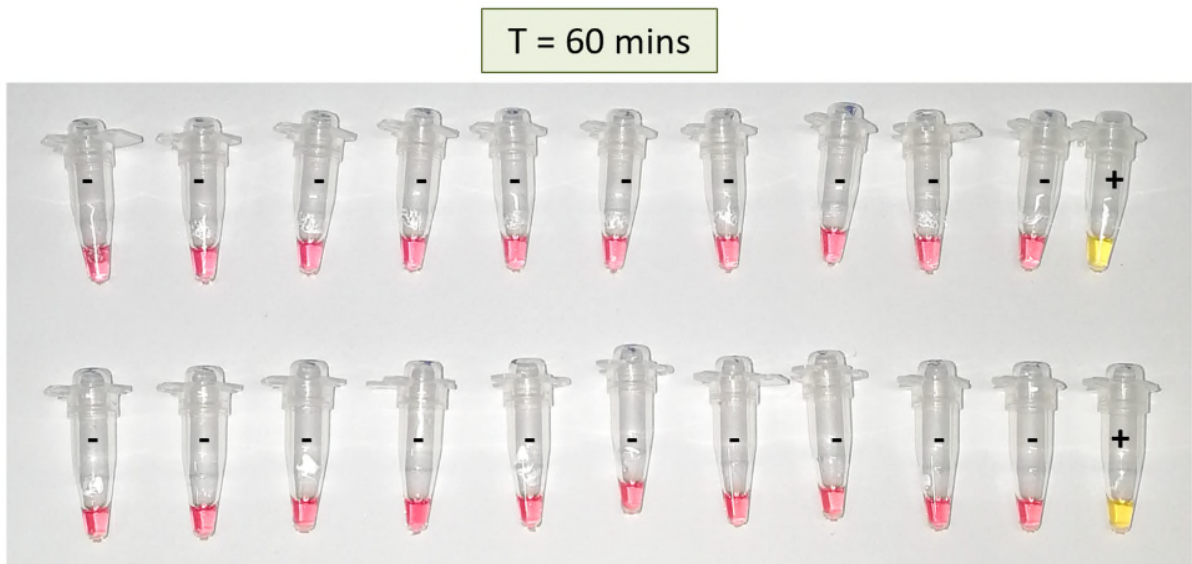

**Supplementary Figure S1. The switch can stabilise RT-LAMP performance within an hour of incubation.** O117\_N generated 60% false positive results (12/20 reactions) due to self- and off-target amplification in human RNA control sample after incubating at 65 °C for 60 minutes. O117\_Q still shows negative to human RNA control as long as 60 minutes at 65 °C reaction.

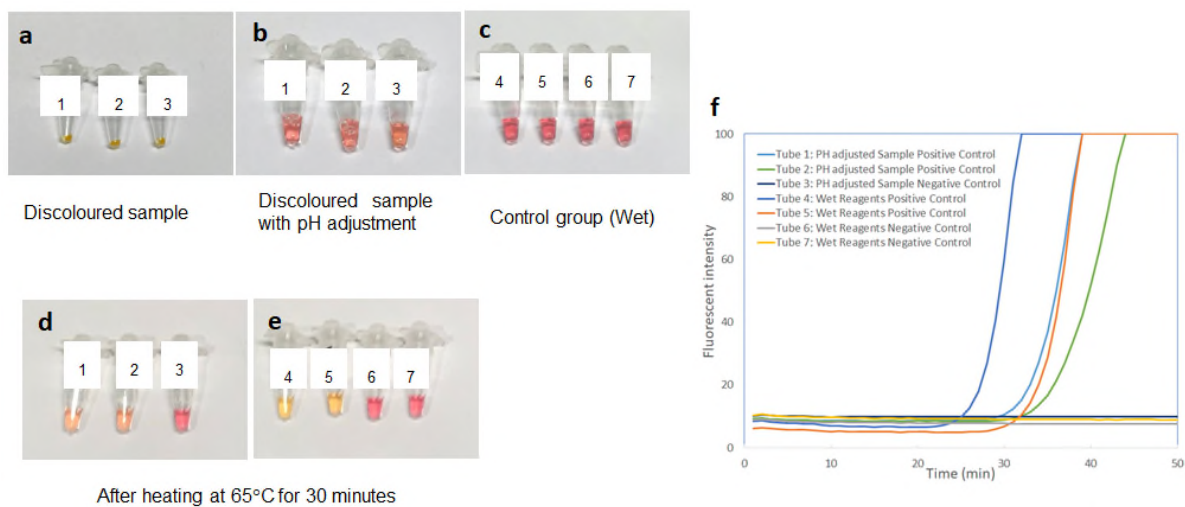

**Supplementary Figure S2. RT-LAMP performance of pH corrected decolored kits that were stored at room temperature for 7 days.** Colour change of dried to yellow after storage of 7 days (a). The pH of kits can be adjusted by adding KOH and the colour of the adjusted mixes (b) produced a similar colour to original fresh mixes (c). The pH colour-corrected mixes can perform colorimetric detection of Synthetic RNA Control 2 - MN908947.3 (Twist Bioscience) at 200 copies in final reaction solution (d and e). 1 and 2: pH adjusted mixes with viral RNA, 3. Blank control of pH adjusted mix with water. 4 and 5: control mixes with viral RNA. 6 and 7: Blank control of fresh mixes with water. (f) Fluorescent detection of the amplification process of pH corrected and fresh mixes.

Day 0 in room temperature (20 °C)

Before reaction T= 0 min

|         | Before reconstitution                                                             | After reconstitution                                                               |
|---------|-----------------------------------------------------------------------------------|------------------------------------------------------------------------------------|
| Batch 1 |  |  |
| Batch 2 |                                                                                   |                                                                                    |
| Batch 3 |                                                                                   |                                                                                    |
|         | 1 2 3 4 5 6 7 8                                                                   | 1 2 3 4 5 6 7 8                                                                    |

Day 0

After reaction T= 30 min

|         | Before 65°C for 30 minutes                                                          | After 65°C for 30 minutes                                                            |
|---------|-------------------------------------------------------------------------------------|--------------------------------------------------------------------------------------|
| Batch 1 | 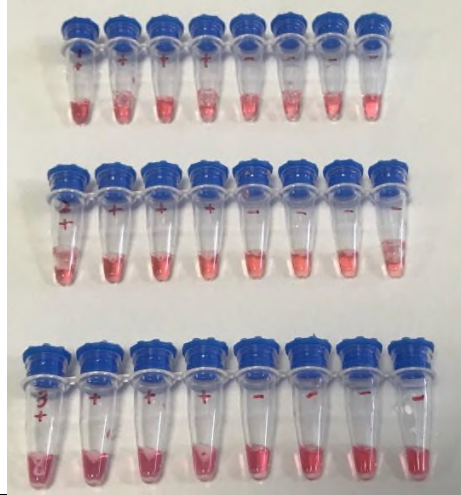 |  |
| Batch 2 |                                                                                     |                                                                                      |
| Batch 3 |                                                                                     |                                                                                      |
|         | 1 2 3 4 5 6 7 8                                                                     | 1 2 3 4 5 6 7 8                                                                      |

Day 15 in room temperature (20 °C)

Before reaction T= 0 min

|         | Before reconstitution                                                              | After reconstitution                                                                |
|---------|------------------------------------------------------------------------------------|-------------------------------------------------------------------------------------|
| Batch 1 |   |   |
| Batch 2 |   |   |
| Batch 3 |  |  |
|         | 1 2 3 4 5 6 7 8                                                                    | 1 2 3 4 5 6 7 8                                                                     |

Day 15

After reaction T= 30 min

|         | Before 65°C for 30 minutes                                                         | After 65°C for 30 minutes                                                           |
|---------|------------------------------------------------------------------------------------|-------------------------------------------------------------------------------------|
| Batch 1 |   |   |
| Batch 2 |   |   |
| Batch 3 |  |  |
|         | 1 2 3 4 5 6 7 8                                                                    | 1 2 3 4 5 6 7 8                                                                     |

**Supplementary Figure S3. Long-term storage of optimized RT-LAMP dried reaction mixes at room temperature.** Dried mixes were stored for day 0 (A) and day 15 (B) at room temperature. Dried mixes were reconstituted with 20  $\mu$ L DNase/RNase free water followed by the addition of 5  $\mu$ L of Synthetic RNA Control 2 - MN908947.3 (40 copies/ $\mu$ L, Twist Bioscience) or human genome DNA as negative control. (iii) Tubes were incubated at 65 °C for 30 minutes. Each time three batches and each batch three replicates were carried out.



O117\_N

O117\_Q

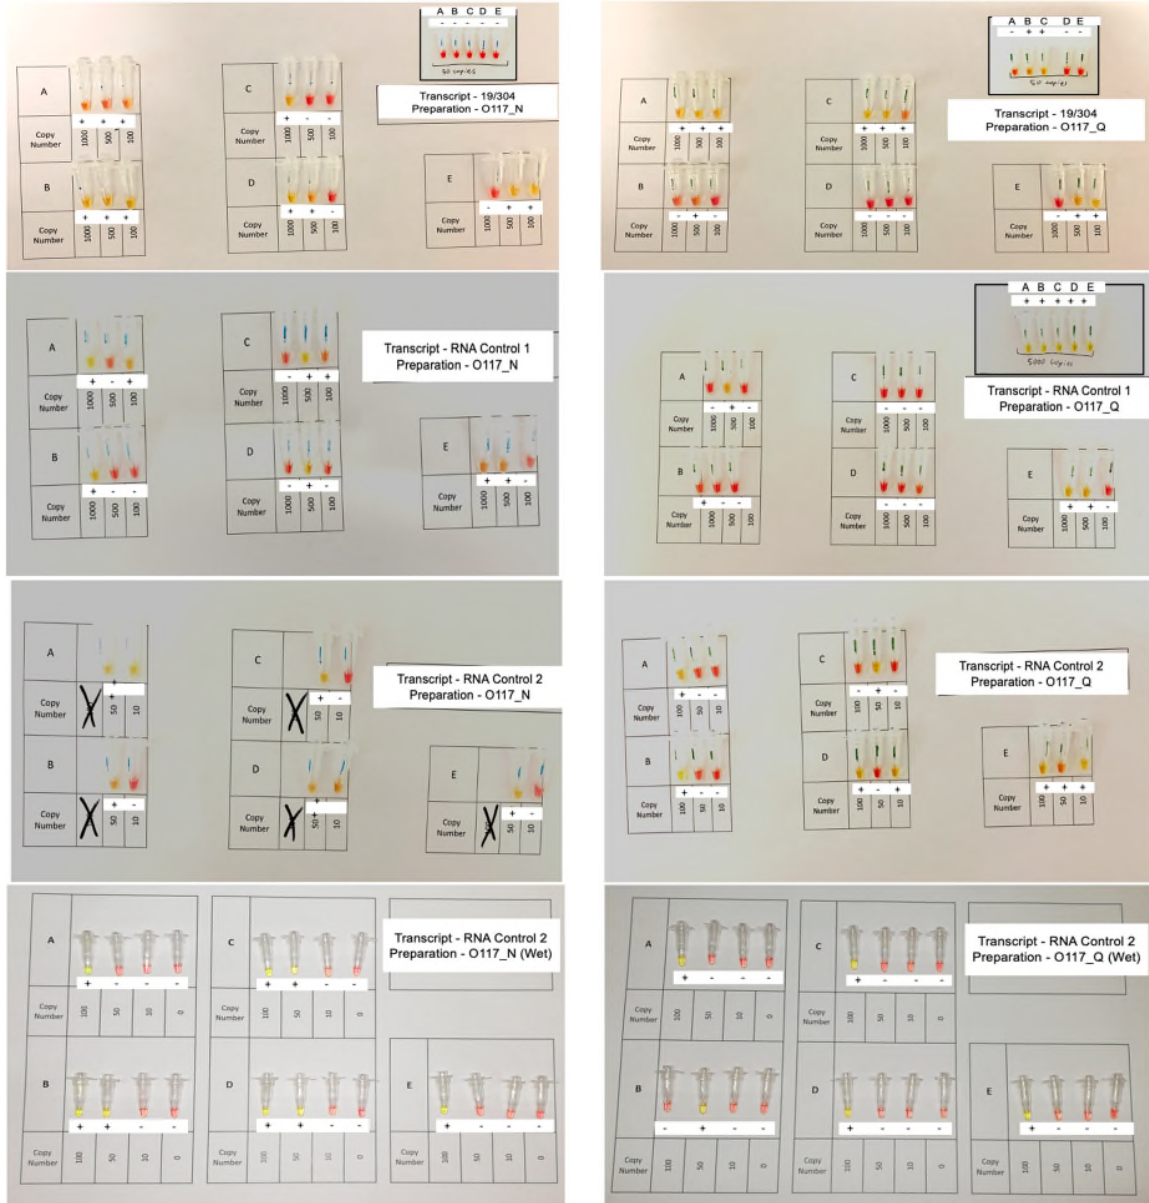

**Supplementary Figure S4. Sensitivity analysis of improved RT-LAMP assay.** SARS-CoV-2 RNA transcript and reaction mix used in each experiment are labelled on the top right white box of each image. '+' indicates a positive result while '-' indicates a negative result. A, B, C, D, E represents five technical replicates.

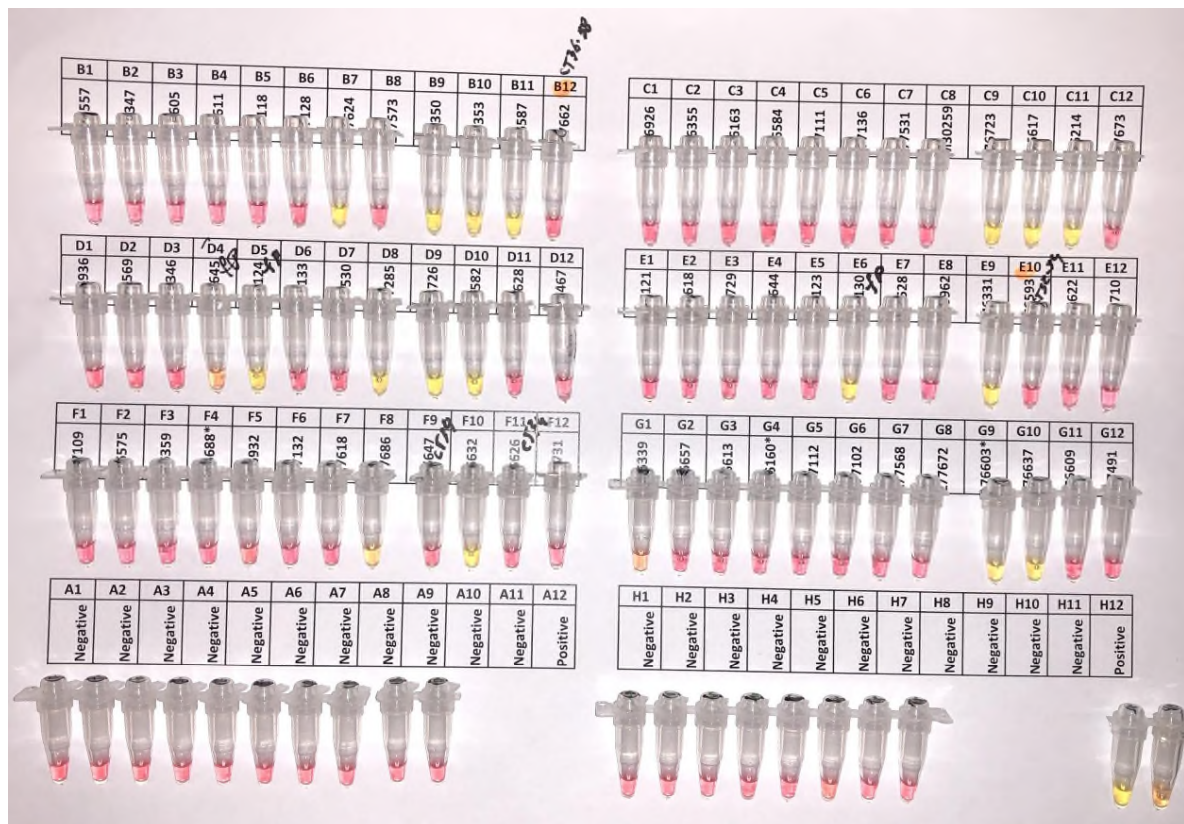

**Supplementary Figure S5a. Detection of SARS-CoV-2 from clinical RNA extracts by RT-LAMP in John Radcliff hospital Oxford.** Performance of RT-LAMP assay using wet reaction mix containing O117\_Q on detecting SARS-CoV-2 from clinical RNA extract samples. Data was collected on 22nd May 2020. A1-A10 and H1-H8 are the negative controls, H11 and H12 are the positive controls.



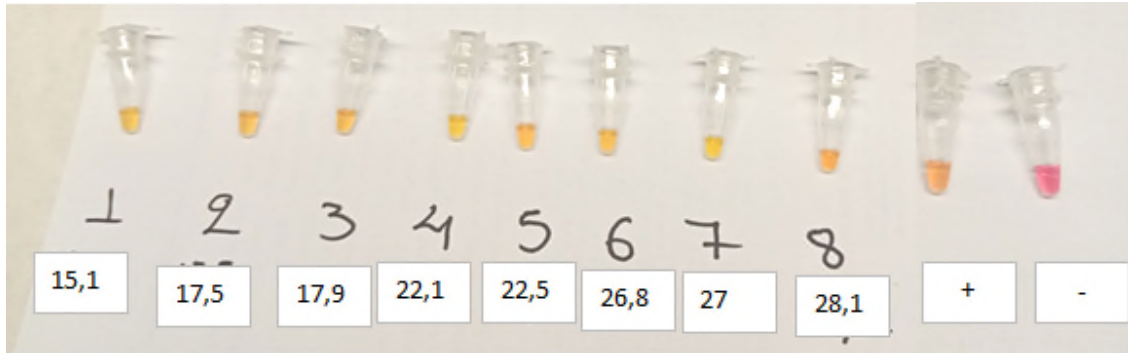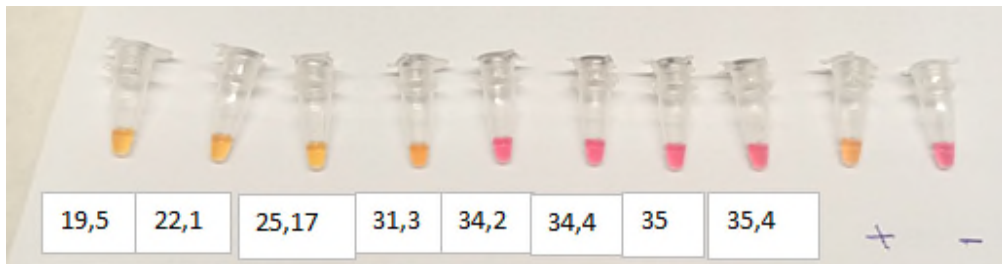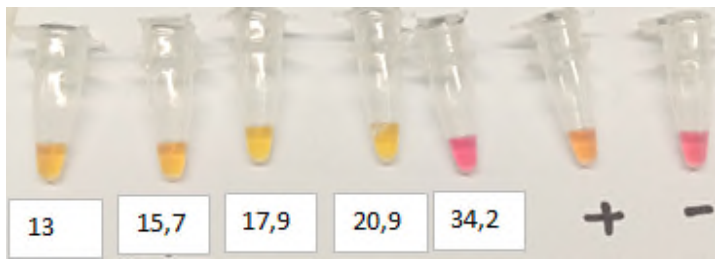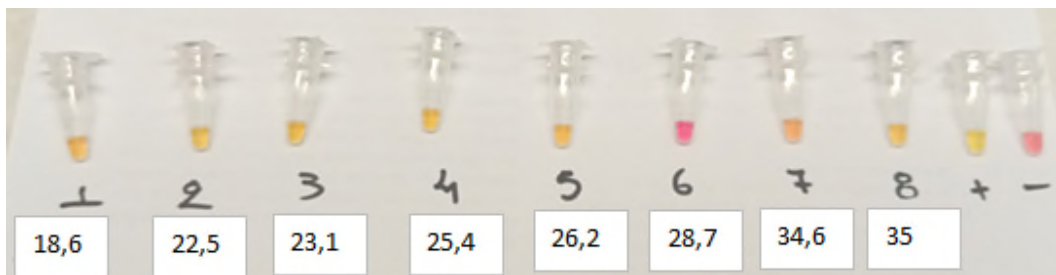

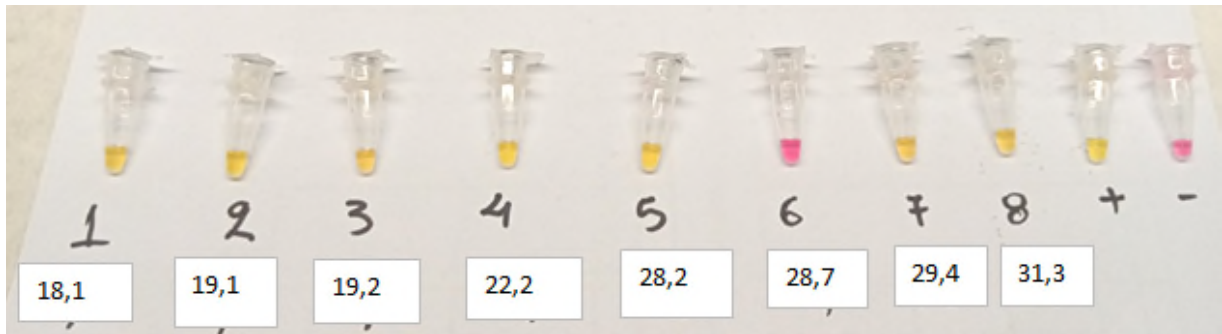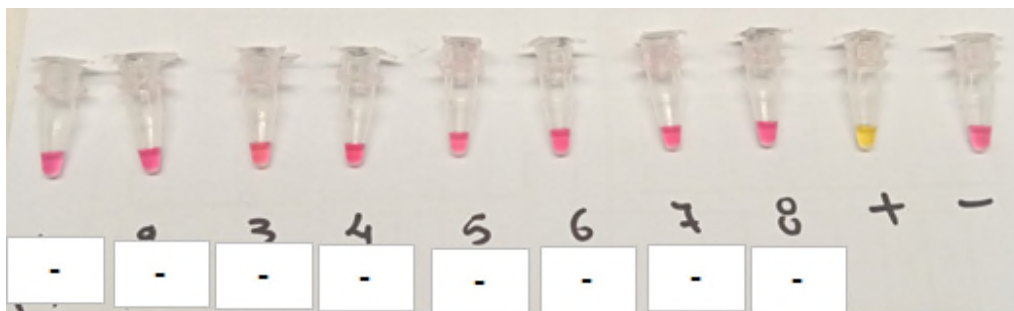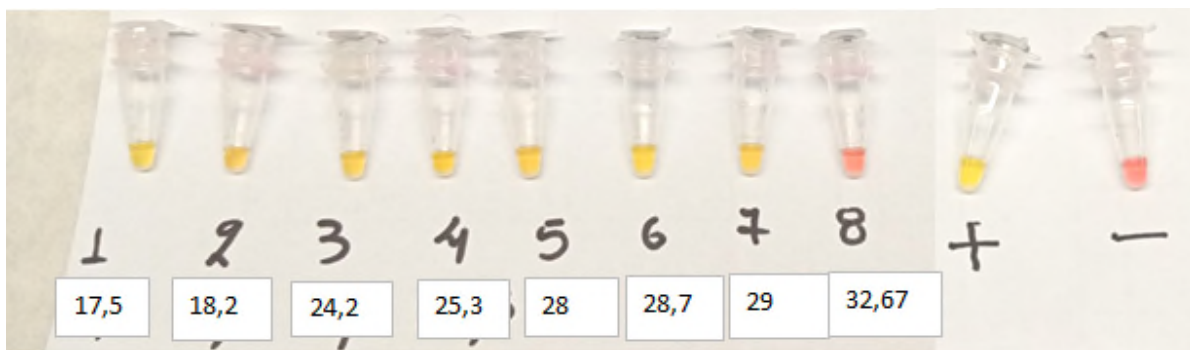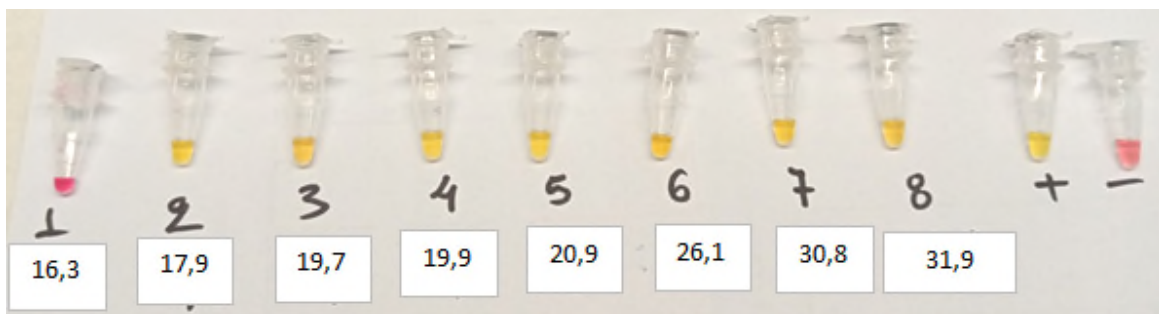

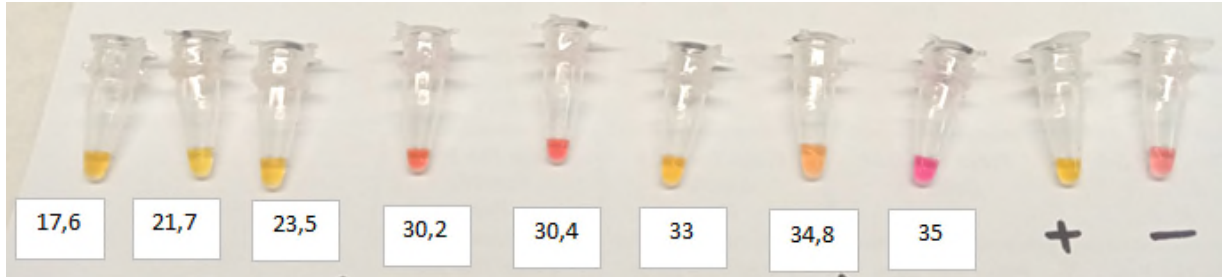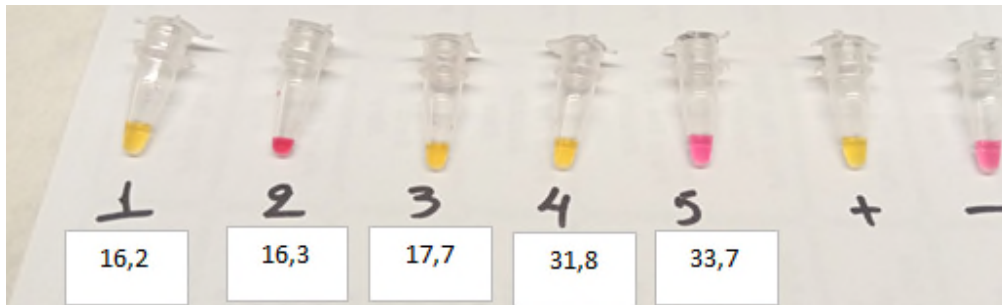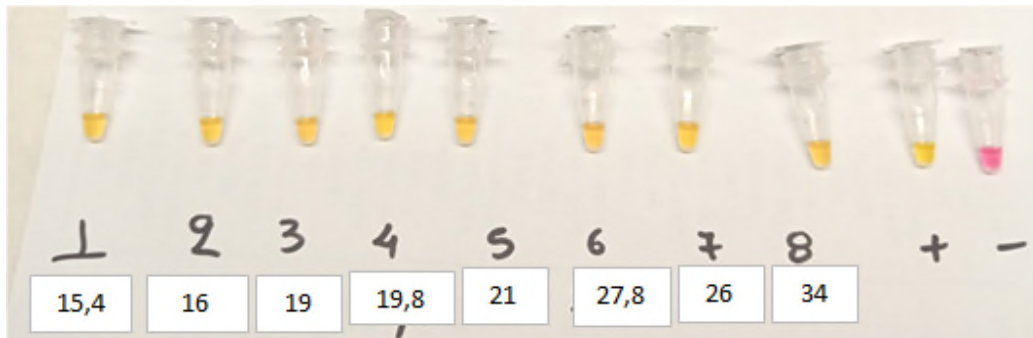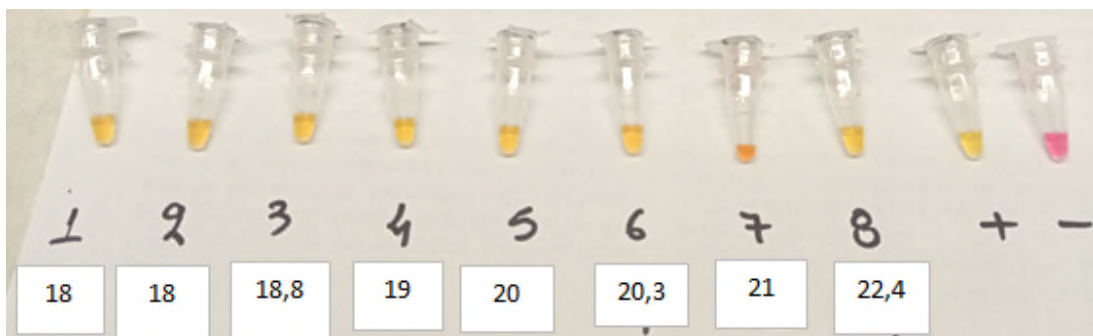

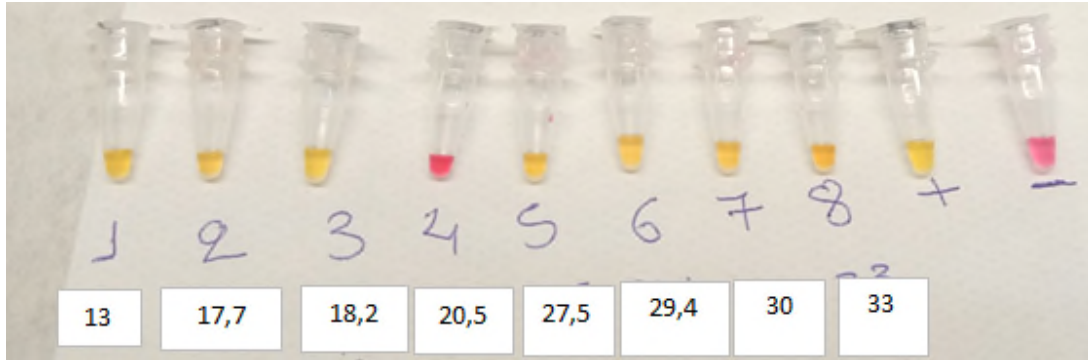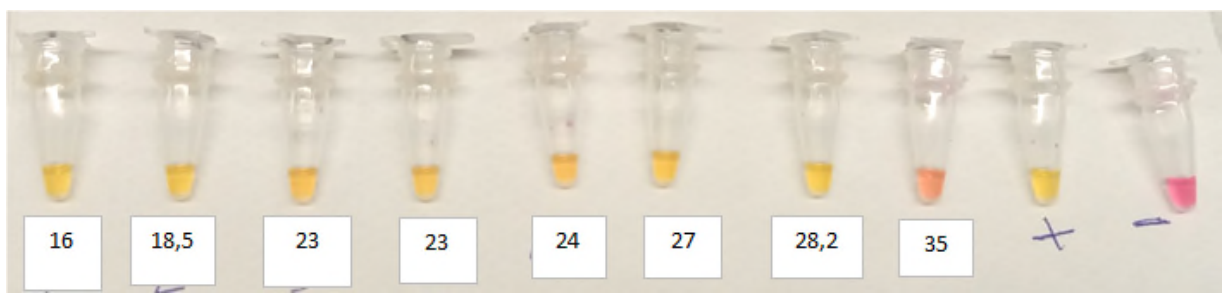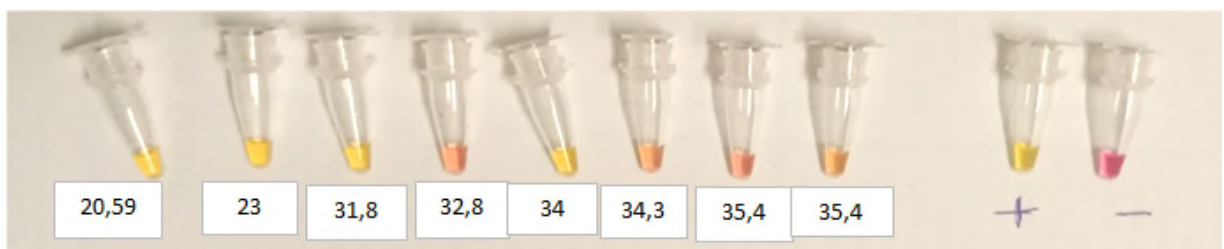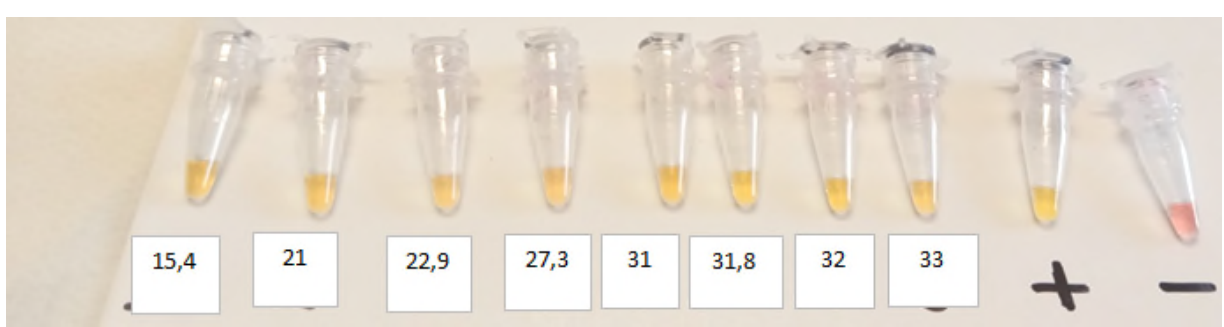

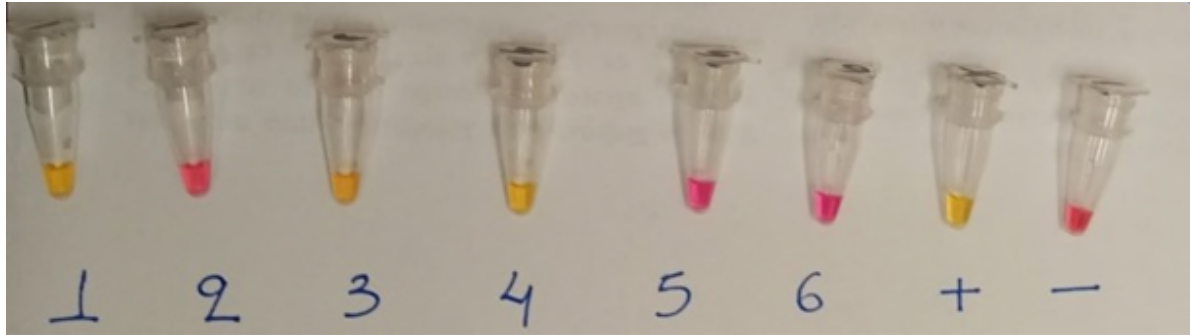

**Supplementary Figure S5b. Detection of SARS-CoV-2 from 126 RNA extracts (116 positives and 10 negatives) by RT-LAMP in University Hospital of Alexandroupolis, Greece.** Performance of RT-LAMP assay using freeze drying reaction mix containing O117\_Q on detecting SARS-CoV-2 from RNA extract from saliva samples. PC: positive control and NC: negative control.

1: Water  
2: + 5 Twist RNA copies  
3: + 10 Twist RNA copies  
4: + 100 Twist RNA copies

S17 + O117  
without the switch  
caused false  
positive.

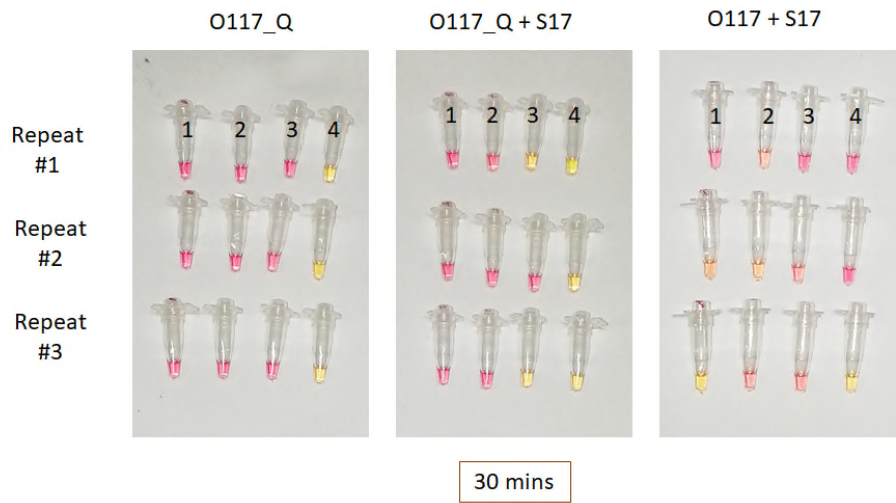

**Supplementary Figure S6. Two sets of primers (O117\_Q and S17) in one reaction enhanced detection sensitivity of SARS-CoV-2 virus in RT-LAMP assay.** Two sets of primers with the switch showed enhanced sensitivity and no false positive results, whilst those without the switch resulted in false positive results.
